# Supplementary material for: Kinetic Monte Carlo Convergence Demands for Thermochemical Recycling Kinetics of Vinyl Polymers with Dominant Depropagation
Source: MDPI journal article supplement (doi:10.3390/pr11061623), 2023-05-26
Supplement: s1 [file s1]

# Supporting information for

## Kinetic Monte Carlo Convergence Demands for Thermochemical Recycling Kinetics of Vinyl Polymers with Dominant Depropagation

Eli K.C. Moens,<sup>1</sup> Yoshi W. Marien,<sup>1</sup> Alessandro D. Trigilio,<sup>1</sup> Kevin M. Van Geem,<sup>1</sup> Paul H.M. Van Steenberge,<sup>1</sup> Dagmar R. D'hooge<sup>1,2\*</sup>

<sup>1</sup> Laboratory for Chemical Technology, Ghent University, Technologiepark 125, 9052 Ghent, Belgium

<sup>2</sup> Centre for Textile Science and Engineering, Ghent University, Technologiepark 70a, 9052 Ghent, Belgium

### S1. Polymerization conditions and feedstock characteristics

Three feedstocks have been synthesized in silico. For this two polymerization temperatures are formally chosen. Feedstock A and B are modeled at a lower temperature and feedstock C at a higher temperature. All three feedstocks are simulated with an initial initiator to monomer ratio of 0.0025 up to a monomer conversion of 0.2, according to the model of De smit et al. [1] but assuming intrinsic kinetics.

**Table S1: Rate coefficients used for modelling the polymer feedstock A, B and C in Figure 2 of the main text; for simplicity no chain transfer to monomer.**

| Reaction                         | Equation                              | A                    | B                    | C                    | units                       |
|----------------------------------|---------------------------------------|----------------------|----------------------|----------------------|-----------------------------|
| Initiator decomposition          | $I_2 \rightarrow 2I^*$                | $1.2 \times 10^{-4}$ | $1.2 \times 10^{-4}$ | $3.8 \times 10^{-7}$ | $s^{-1}$                    |
| Chain initiation                 | $I^* + M \rightarrow R_1^*$           | $2.0 \times 10^3$    | $2.0 \times 10^3$    | $5.0 \times 10^2$    | $L \text{ mol}^{-1} s^{-1}$ |
| Propagation                      | $R_i^* + M \rightarrow R_{i+1}^*$     | $2.0 \times 10^3$    | $2.0 \times 10^3$    | $5.0 \times 10^2$    | $L \text{ mol}^{-1} s^{-1}$ |
| Termination – Combination        | $R_i^* + R_j^* \rightarrow P_{i+j}$   | $1.0 \times 10^9$    | $3.0 \times 10^8$    | $3.0 \times 10^7$    | $L \text{ mol}^{-1} s^{-1}$ |
| Termination – Disproportionation | $R_i^* + R_j^* \rightarrow P_i + P_j$ | 0                    | $7.0 \times 10^8$    | $7.0 \times 10^7$    | $L \text{ mol}^{-1} s^{-1}$ |

To confirm convergence was obtained at the chosen simulation volume for the polymerization of feedstock A, B and C an addition simulation was performed with a five times larger simulation volume.

This meant for feedstock A and B a  $\sum_i i \cdot X_{P_i}$  of  $5 \times 10^9$  and for feedstock C  $5 \times 10^{10}$ . In Figure S1 a convergence of the polymerization results is shown for the three feedstocks for both simulation volumes (subplot a: conversion and subplot b number CLD).

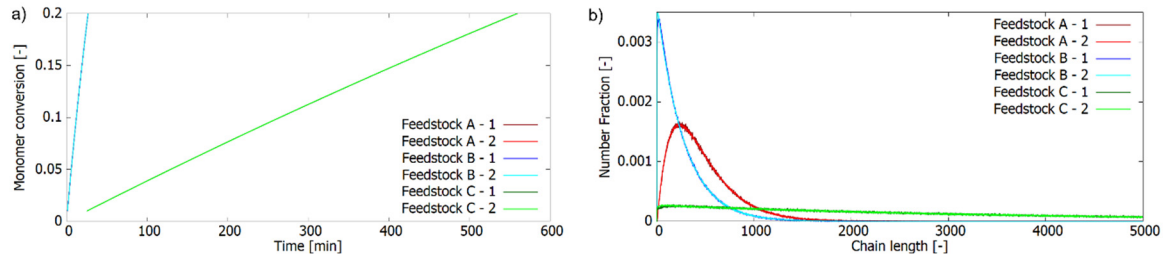

**Figure S1: Convergence check of feedstock A, B and C at simulation volume 1 and 2 regarding monomer conversion (a) and CLD (b).**

## S2. Simulation times and volume

**Table S2: Simulation duration of the thermochemical degradation of the three feedstocks at the defined cases in the main text (95% carbon-based conversion)**

| Case | $\sum_i i \cdot X_{P_i}$ | Feedstock A<br>[min] | Feedstock B<br>[min] | Feedstock C<br>[min] |
|------|--------------------------|----------------------|----------------------|----------------------|
| 1    | $1.0 \times 10^5$        | 2.30                 | 2.45                 | 2.34                 |
| 2    | $1.0 \times 10^6$        | 2.40                 | 2.32                 | 3.12                 |
| 3    | $1.0 \times 10^7$        | 3.05                 | 3.91                 | 3.80                 |
| 4    | $5.0 \times 10^7$        | 3.24                 | 6.71                 | 3.49                 |
| 5    | $1.0 \times 10^8$        | 3.48                 | 6.91                 | 3.45                 |
| 6    | $5.0 \times 10^8$        | 5.35                 | 23.90                | 7.65                 |
| 7    | $1.0 \times 10^9$        | 10.01                | 76.89                | 8.29                 |
| 8    | $5.0 \times 10^9$        | -                    | -                    | 45.47                |
| 9    | $1.0 \times 10^{10}$     | -                    | -                    | 95.89                |

**Table S3: Simulation duration of the thermochemical degradation of the three feedstocks at the defined cases in the main text (50% carbon-based conversion)**

| Case | $\sum_i i \cdot X_{P_i}$ | Feedstock A<br>[min] | Feedstock B<br>[min] | Feedstock C<br>[min] |
|------|--------------------------|----------------------|----------------------|----------------------|
| 1    | $1.0 \times 10^5$        | 1.70                 | 1.78                 | 2.30                 |
| 2    | $1.0 \times 10^6$        | 2.17                 | 1.97                 | 2.48                 |
| 3    | $1.0 \times 10^7$        | 2.52                 | 2.02                 | 2.28                 |
| 4    | $5.0 \times 10^7$        | 1.90                 | 2.25                 | 2.34                 |
| 5    | $1.0 \times 10^8$        | 2.55                 | 2.80                 | 2.58                 |
| 6    | $5.0 \times 10^8$        | 2.68                 | 8.34                 | 5.10                 |
| 7    | $1.0 \times 10^9$        | 5.20                 | 22.58                | 7.22                 |
| 8    | $5.0 \times 10^9$        | -                    | -                    | 36.15                |
| 9    | $1.0 \times 10^{10}$     | -                    | -                    | 81.27                |

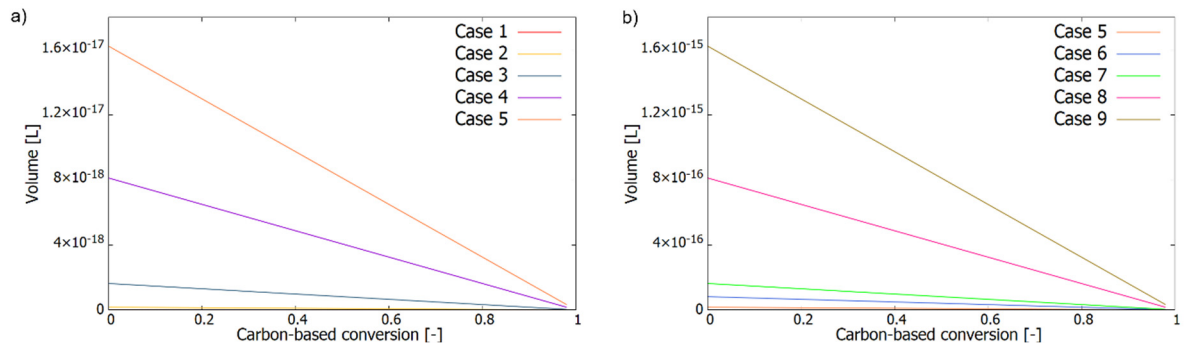

**Figure S2: Evolution of the simulation volume as a function of carbon-based conversion for case 1 to 5 on the left (a) and case 5 to 9 on the right (b) for feedstock C.**

### S3. Simulation results for Feedstock C

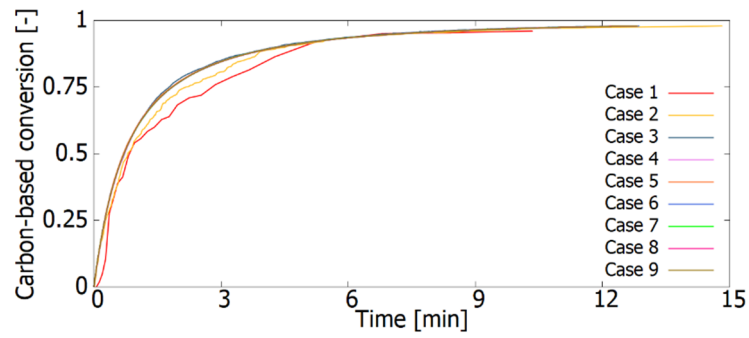

Figure S3: Effect of the MC control volume (Table 2) on the simulated carbon-based conversion profile for thermal degradation of feedstock C (Figure 1); kinetic parameters in Table 1.

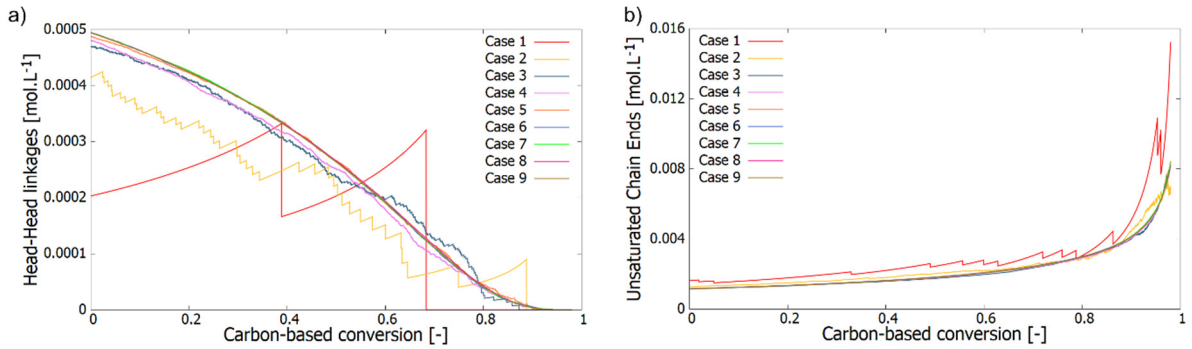

Figure S4: Effect of the MC control volume on the concentration of (a) Head-Head linkages during thermal degradation of feedstock C and (b) the unsaturated chain-ends expressed in  $\text{mol.L}^{-1}$ .

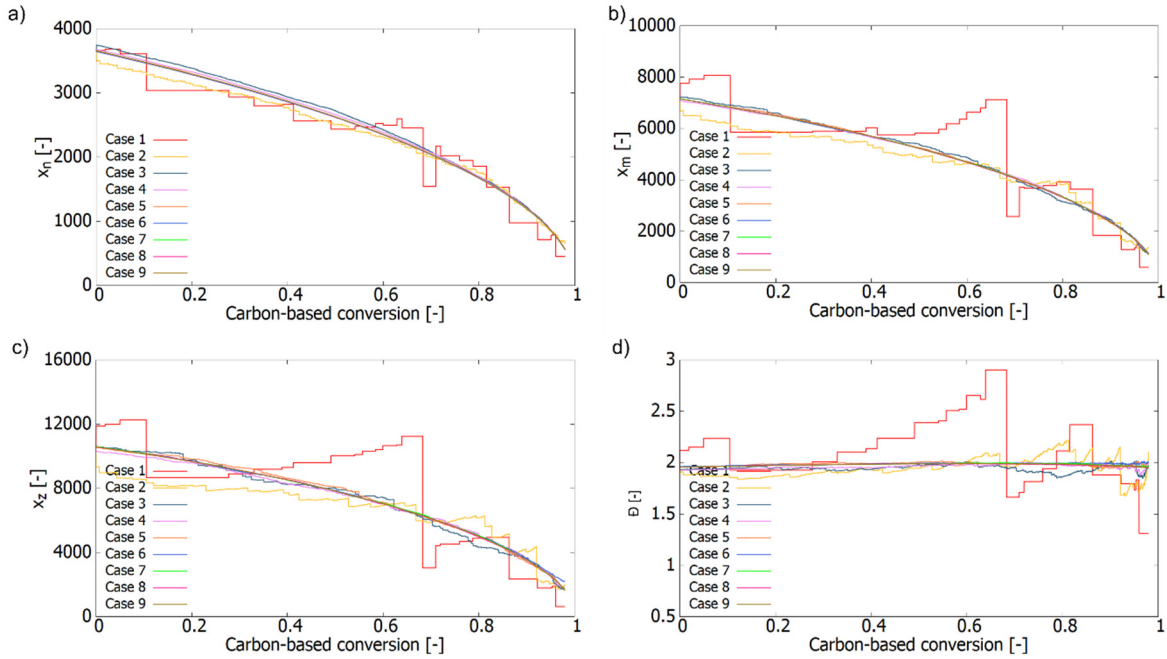

Figure S5: Effect of the MC control volume on the evolution of (a) the number average chain length ( $x_n$ ), (b) the mass average chain length ( $x_m$ ), (c) the z-average chain length ( $x_z$ ) and (d) dispersity ( $\bar{D}$ ) during thermal degradation of Feedstock C (Figure 12); model parameters: Table 1.

**Table S4: Average relative error (%) (eq.7) for the carbon-based conversion ( $\epsilon_{convC}$ ) the number average chain length ( $\epsilon_{x_n}$ ), mass average chain length ( $\epsilon_{x_m}$ ), dispersity ( $\mathcal{D}$ ), and z-average chain length ( $\epsilon_{x_z}$ ) for feedstock C. In italic the starting point to reach the threshold (by default 1% but for  $\epsilon_{x_z}$  0.5%).**

| Cases             | $\epsilon_{conversion} (\%)$ | $\epsilon_{x_n} (\%)$ | $\epsilon_{x_m} (\%)$ | $\epsilon_D (\%)$ | $\epsilon_{x_z} (\%)$ |
|-------------------|------------------------------|-----------------------|-----------------------|-------------------|-----------------------|
| 1 $\rightarrow$ 2 | 5.35                         | 7.58                  | 17.99                 | 13.71             | 28.63                 |
| 2 $\rightarrow$ 3 | 3.51                         | 5.45                  | 8.44                  | 4.08              | 17.78                 |
| 3 $\rightarrow$ 4 | <i>0.71</i>                  | 1.31                  | 2.01                  | 1.34              | 3.73                  |
| 4 $\rightarrow$ 5 | 0.46                         | 1.09                  | <i>0.92</i>           | 1.41              | 2.78                  |
| 5 $\rightarrow$ 6 | 0.34                         | <i>0.27</i>           | 0.55                  | <i>0.50</i>       | 2.01                  |
| 6 $\rightarrow$ 7 | 0.11                         | 0.31                  | 0.31                  | 0.30              | 1.09                  |
| 7 $\rightarrow$ 8 | 0.09                         | 0.10                  | 0.20                  | 0.18              | <i>0.39</i>           |
| 8 $\rightarrow$ 9 | 0.05                         | 0.07                  | 0.14                  | 0.11              | 0.27                  |

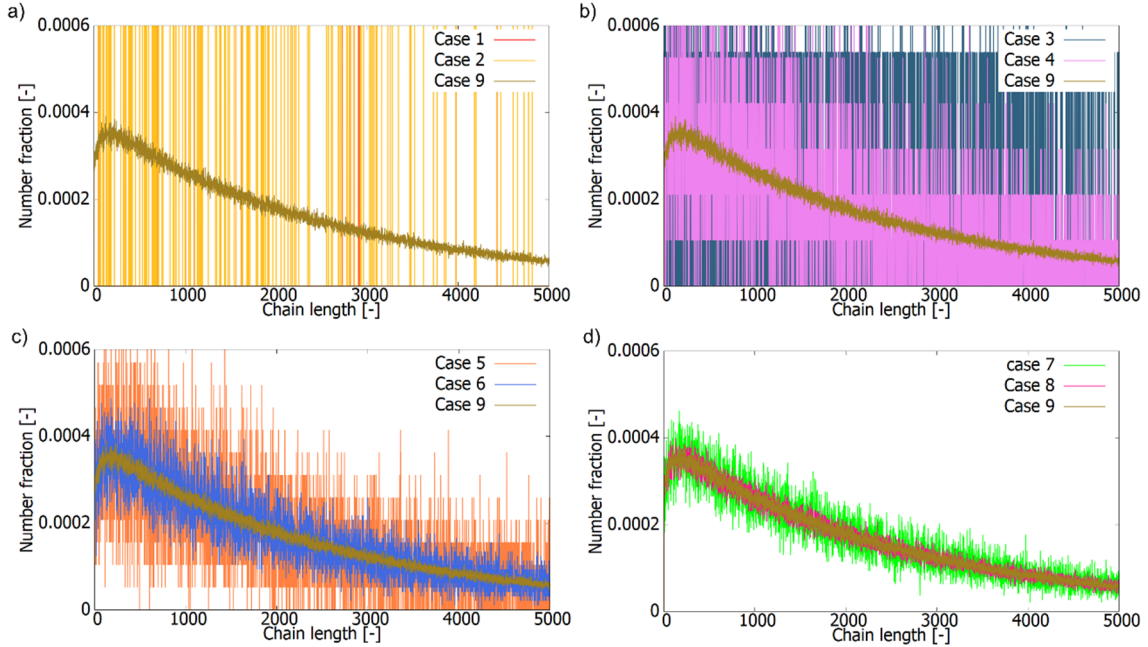

**Figure S6: Number chain length distribution (CLD) at a carbon-based conversion of 50% for feedstock B for several cases with the CLD corresponding to Case 9 included in all subplots for comparison; (a) case 1 and 2, (b) case 3 and 4, (c) case 5 and 6, (d) case 7 and 8. Practically case 7 can be selected as converged.**

## S4. Radical concentration

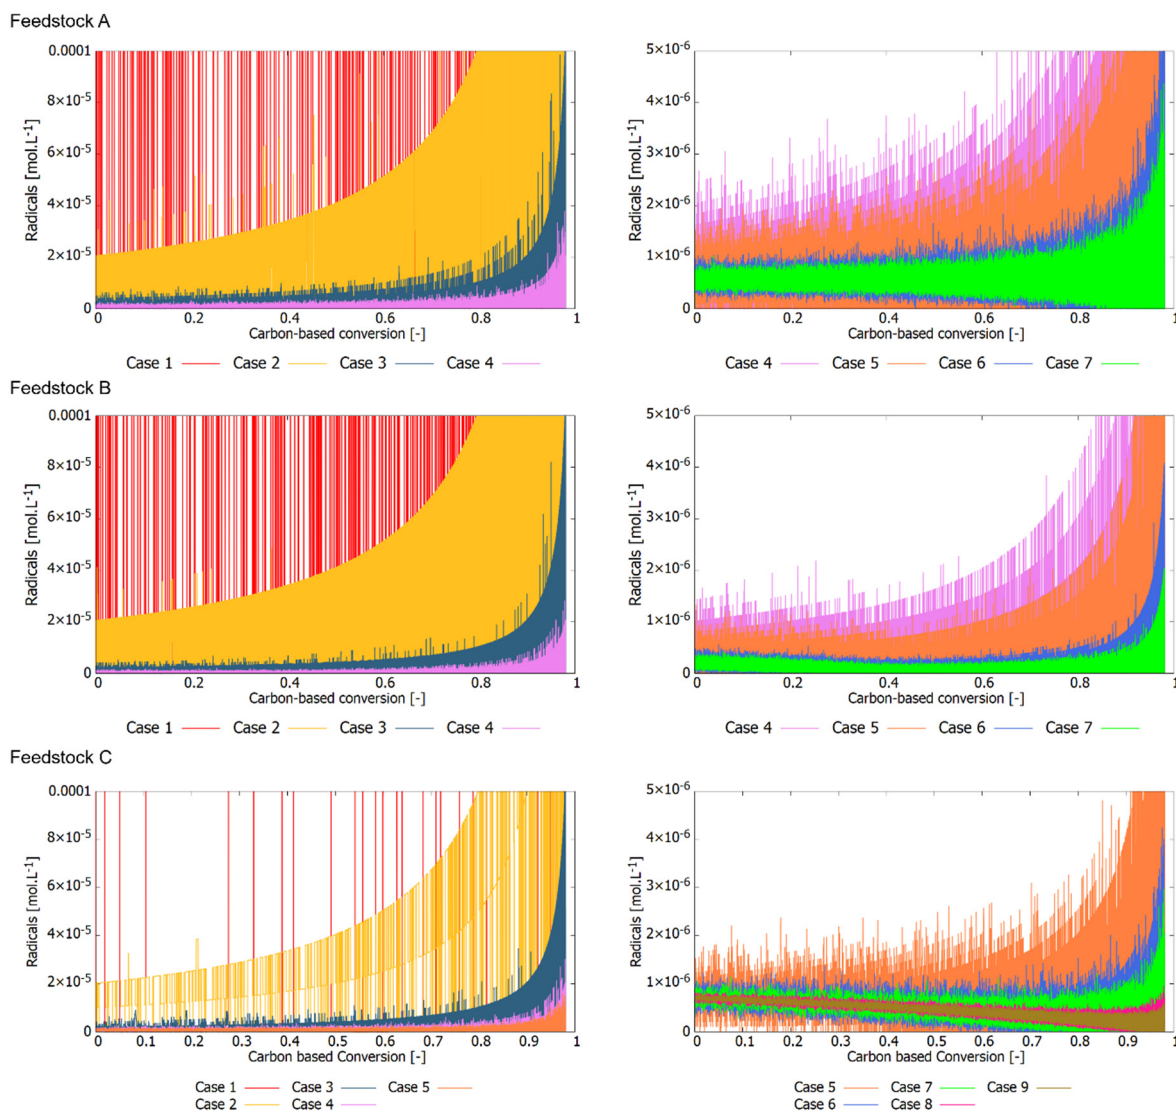

**Figure S7: Radical concentration during the thermal degradation of feedstock A (cases 1 to 4 on the top left and 4 to 7 on the top right), feedstock B (cases 1 to 4 on the center left and 4 to 7 on the center right) and feedstock C (cases 1 to 5 on the bottom left)**

## S5. References

1. De Smit, K., et al., *Connecting polymer synthesis and chemical recycling on a chain-by-chain basis: a unified matrix-based kinetic Monte Carlo strategy*. Reaction Chemistry & Engineering, 2020. 5(10): p. 1909-1928.
